# Supplementary material for: Characterization of Chitosan Hydrogels Obtained through Phenol and Tripolyphosphate Anionic Crosslinking
Source: MDPI journal article supplement (doi:10.3390/polym16091274), 2024-05-02
Supplement: s1 [file s1]

Supporting information

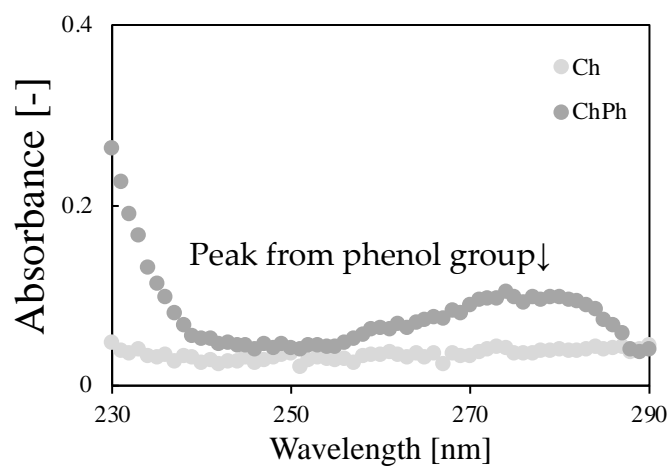

Figure S1. UV-vis spectrum of 0.1 wt% chitosan (Ch) and ChPh solution (solvent: 20 mM HCl)

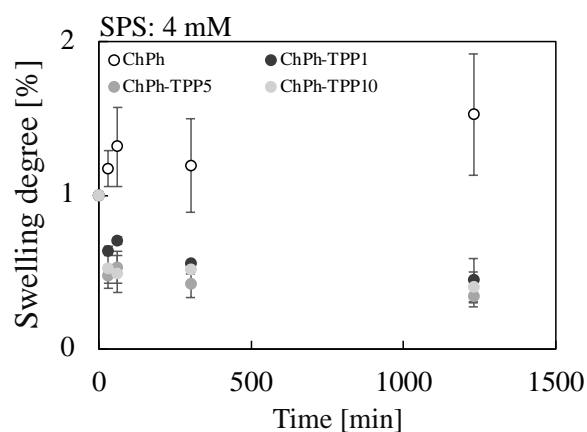

Figure S2. Time-course measurement of swelling degree of ChPh, ChPh-TPP1, 5, and 10 (n=3, Data:  $\pm$  S.D.)

**Table S1. Weight (mg) comparison of ChPh, ChPh-TPP1,5, and 10 after 5 h of immersion in PBS , n=3, Data:  $\pm$  S.D.**

| SPS 1 mM | ChPh          | ChPh-TPP1    | ChPh-TPP5   | ChPh-TPP10  |
|----------|---------------|--------------|-------------|-------------|
| 0h       | $126 \pm 40$  | $118 \pm 10$ | $90 \pm 16$ | $84 \pm 19$ |
| 5h       | $263 \pm 140$ | $116 \pm 14$ | $59 \pm 20$ | $45 \pm 6$  |

  

| SPS 2 mM | ChPh         | ChPh-TPP1    | ChPh-TPP5    | ChPh-TPP10   |
|----------|--------------|--------------|--------------|--------------|
| 0 h      | $154 \pm 22$ | $131 \pm 34$ | $124 \pm 11$ | $104 \pm 10$ |
| 5 h      | $238 \pm 46$ | $92 \pm 53$  | $52 \pm 10$  | $38 \pm 4$   |

  

| SPS 4 mM | ChPh         | ChPh-TPP1    | ChPh-TPP5   | ChPh-TPP10 |
|----------|--------------|--------------|-------------|------------|
| 0 h      | $170 \pm 20$ | $114 \pm 18$ | $81 \pm 18$ | $72 \pm 5$ |
| 5 h      | $201 \pm 51$ | $63 \pm 9$   | $33 \pm 3$  | $37 \pm 4$ |

**Table S2. Weight (mg) comparison of ChPh, ChPh-TPP1,5, and 10 after 5 h of incubation at 20 °C, n=5, Data:  $\pm$  S.D.**

|     | ChPh         | ChPh-TPP1    | ChPh-TPP5    | ChPh-TPP10   |
|-----|--------------|--------------|--------------|--------------|
| 0 h | $147 \pm 24$ | $132 \pm 12$ | $150 \pm 28$ | $107 \pm 27$ |
| 5 h | $26 \pm 11$  | $61 \pm 23$  | $58 \pm 20$  | $32 \pm 11$  |
